# Supplementary material
Source: publisher site journal article supplement (https://www.dovepress.com/article/269236)

**Supplementary Figure 1 Downregulation of miR-200a attenuated TP-induced cell death in TM-3 cells.** TM-3 cells were transfected with miR-200a antagomir (5, 10, or 20 nM) firstly, and then exposed to 120 nM TP for 24 h. **(A)** CCK-8 assay was used to detect the cell viability, and the experiment was performed in quintuplicate. **(B)** Apoptotic cells were measured with Annexin V and PI double staining. The experiment was repeated triply. **(C)** Trypan blue staining assay was used to detect cell death. The experiment was repeated triply. ******P<0.01 compared with control group; **##**P<0.01 compared with TP (120 nM) group. TP, triptolide; CCK-8, Cell Counting Kit-8; PI, propidium iodide.


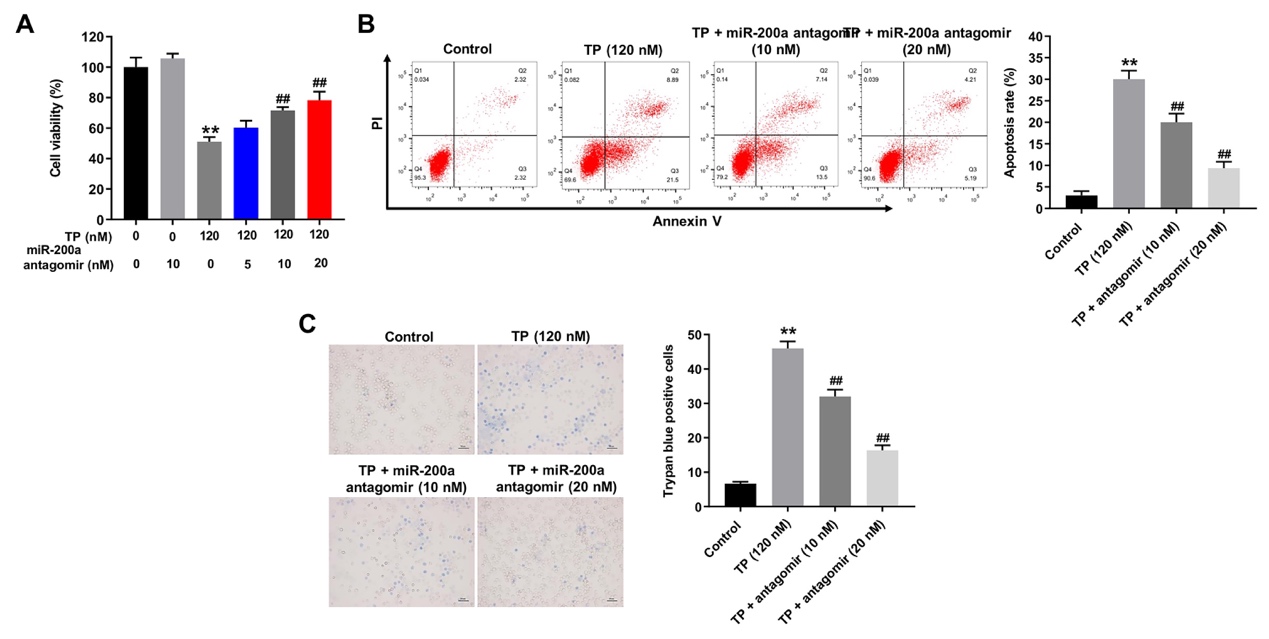

Supplement: Supplementary file 1 [file get_supplementary_file.php]
